# Supplementary material for: Protein Kinase CK1α Sustains B-Cell Receptor Signaling in Mantle Cell Lymphoma
Source: PubMed Central journal article supplement (PMC8551451; doi:10.3389/fonc.2021.733848), 2021-10-14
Supplement: DataSheet_1.pdf [file DataSheet_1.pdf]

## Supplementary Material

### Supplementary Figures

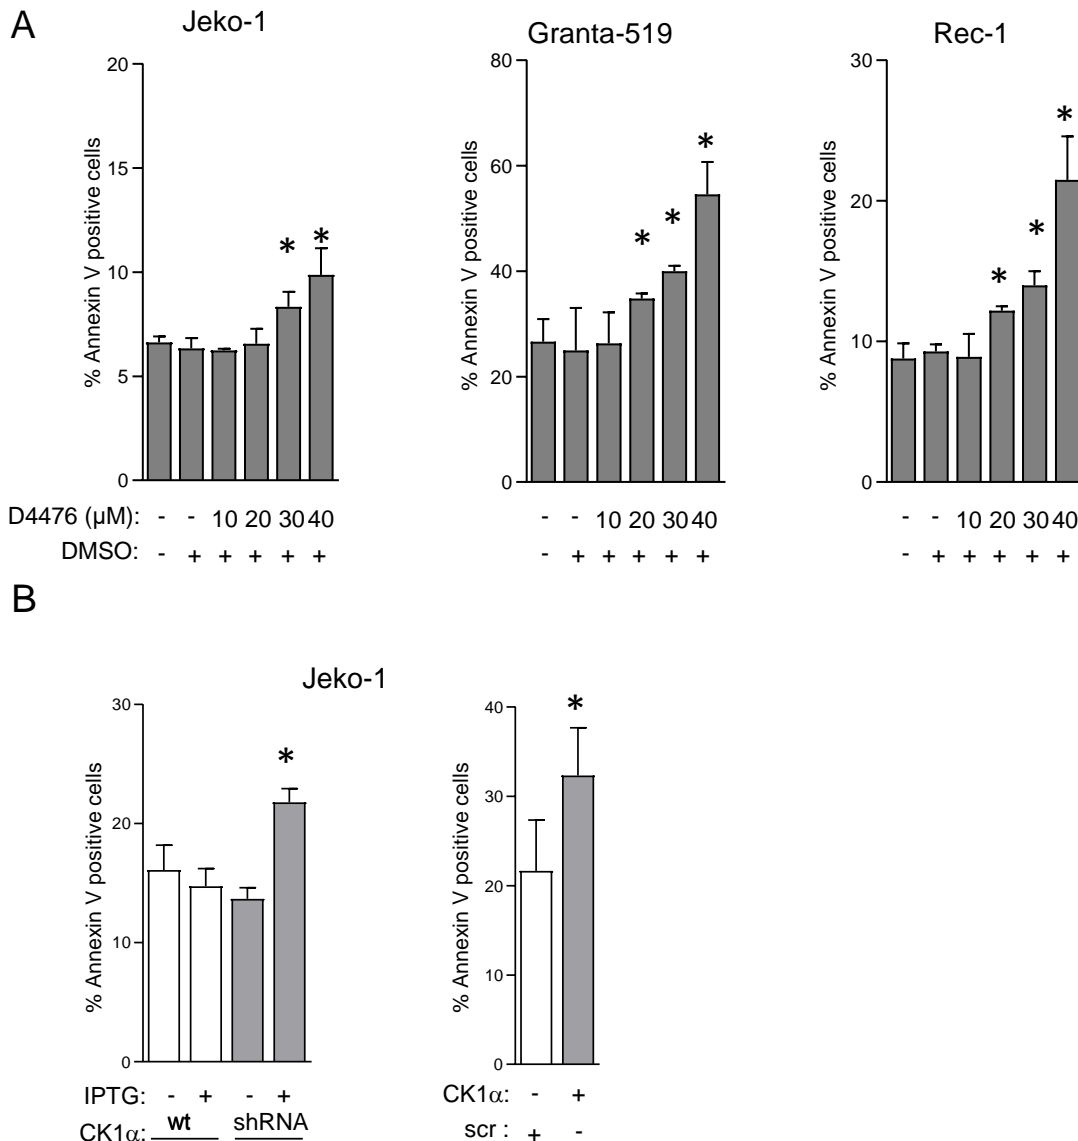

**Supplementary Figure 1. CK1 $\alpha$  sustains MCL cell survival.** Histogram showing % of annexin V positive cells of MCL cell lines Jeko-1 Granta-519 and Rec-1 treated with different concentrations of D4476 for 48h (A), Jeko-1 IPTG inducible *CSNK1A1* directed shRNA clone (named CK1 $\alpha$  shRNA) and Jeko-1 wt treated with IPTG 500 $\mu$ M for 13 days (B left panel) or Jeko-1 cells electroporated with *CSNK1A1* directed siRNAs (B right panel). Data are expressed as mean  $\pm$ SD of n=3 (A), n=4 (B left panel) and n=3 (B right panel) independent experiments. \* indicates  $p < 0.05$  compared to the untreated cell population.

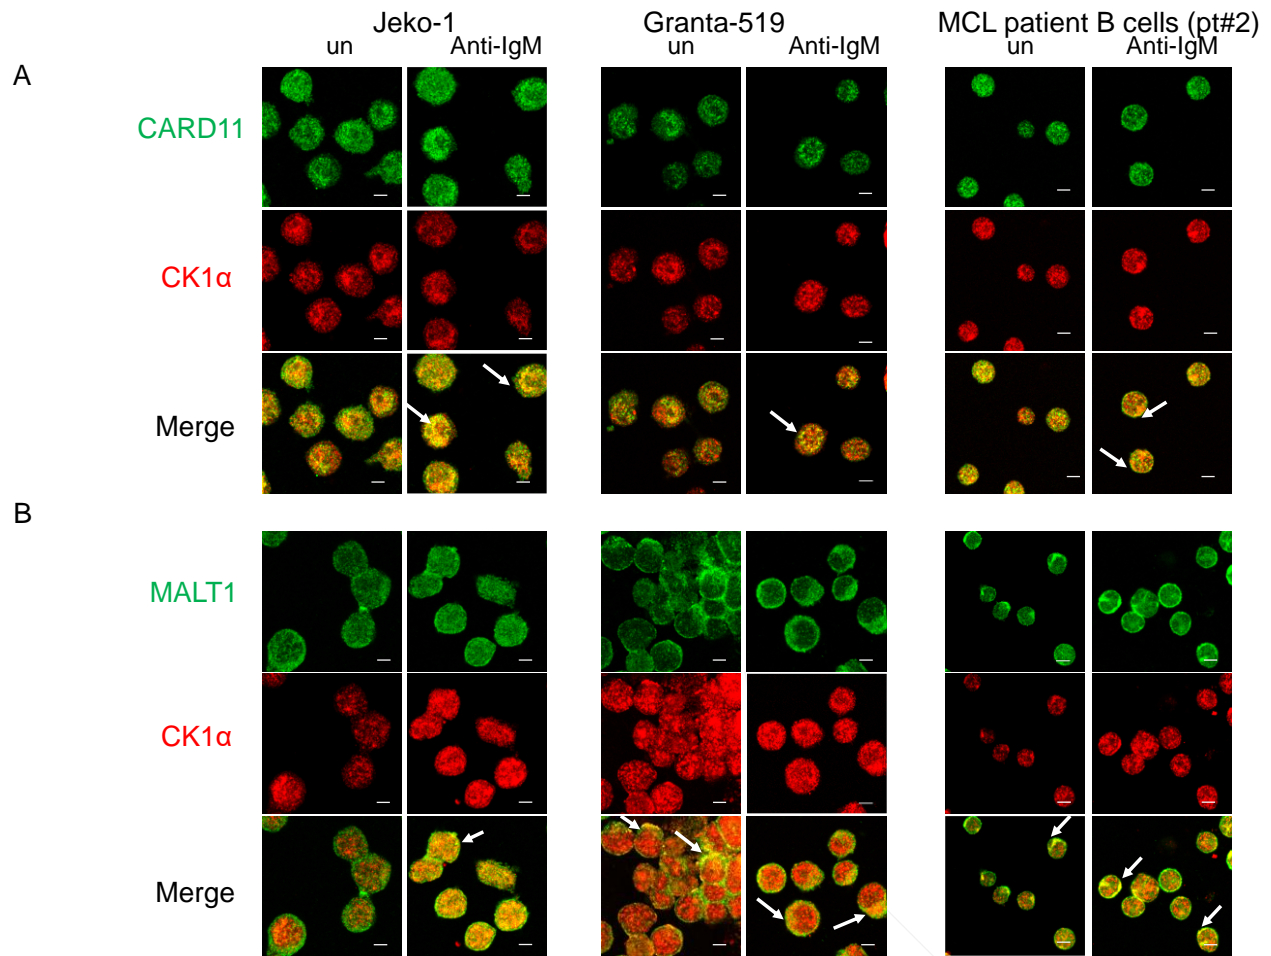

**Supplementary Figure 2. CK1 $\alpha$  associates with the CBM complex.** Co-localization through immunofluorescence of CK1 $\alpha$  (red) with CARD11 (green) (A) and MALT1 (green) (B) in Jeko-1 (left panel), Granta-519 (middle panel) and purified B lymphocytes from one MCL patient (pt#2, right panel), stimulated with anti IgM 10 $\mu$ g/ml for 5 min. Images have been acquired with 63x oil objective. Scale bar =5 $\mu$ m. Arrows indicate discrete zones of colocalization.

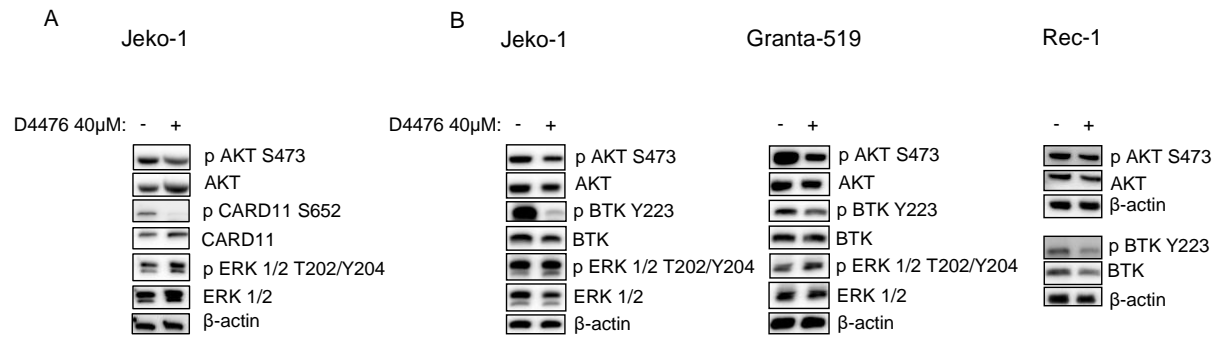

**Supplementary Figure 3. Effects of short term CK1 inhibition on BCR signaling pathways.** Representative WB of BCR dependent signaling in MCL cell lines Jeko-1 treated with D4476 40  $\mu$ M for 6 h (A) and in Jeko-1, Granta-519 and Rec-1 treated with D4476 40  $\mu$ M for 24 h (B). Membranes for WB analysis were probed with antibodies listed in the figure.  $\beta$  actin was used as loading control.

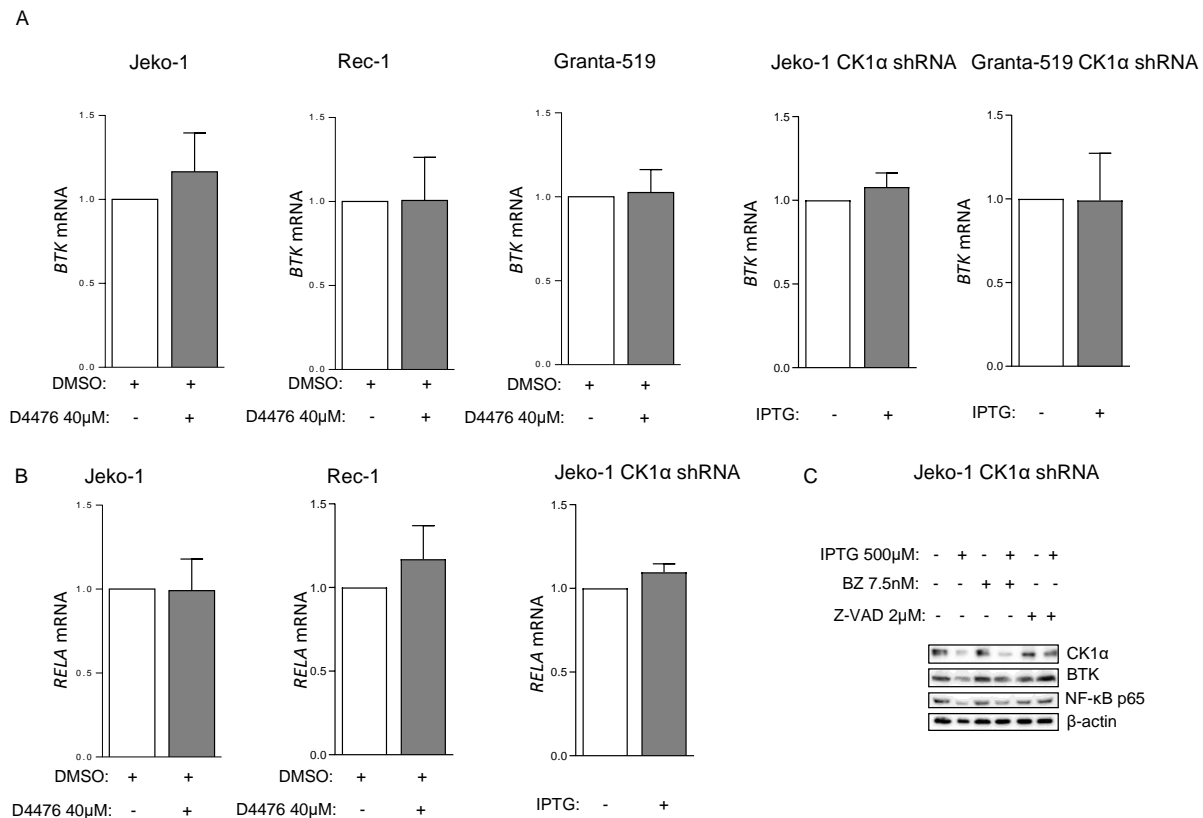

**Supplementary Figure 4. CK1 $\alpha$  inactivation reduces BTK and NF- $\kappa$ B total protein level through a post-translational mechanism.** (A-B) CK1 $\alpha$  chemical inhibition or silencing does not change *BTK* or *RELA* mRNA expression. Quantitative Real Time PCR analysis of *BTK* (A) and *RELA* (B) mRNA expression performed in Jeko-1, Rec-1, Granta-519 treated with D4476 for 48h, on Jeko-1 cells from the CK1 $\alpha$  shRNA cellular clone (Jeko-1 CK1 $\alpha$  shRNA) treated with IPTG 500 $\mu$ M for 13 days, and on cells from Granta-519 CK1 $\alpha$  shRNA cellular clone (Granta-519 CK1 $\alpha$  shRNA) treated with IPTG 500 $\mu$ M for 7 days. Data represent mean  $\pm$  SD of at least 3 independent experiments. (C) Representative

WB of BTK and NF- $\kappa$ B p65 in Jeko-1 IPTG inducible CK1 $\alpha$  directed shRNA clone treated with IPTG 500 $\mu$ M for 13 days (to silence CK1 $\alpha$ ) alone, or in association with bortezomib (BZ) and Z-VAD-FMK (Z-VAD). BZ 7.5 nM and Z-VAD 2 $\mu$ M were added for the last 24h before harvesting.  $\beta$  actin was used as loading control.

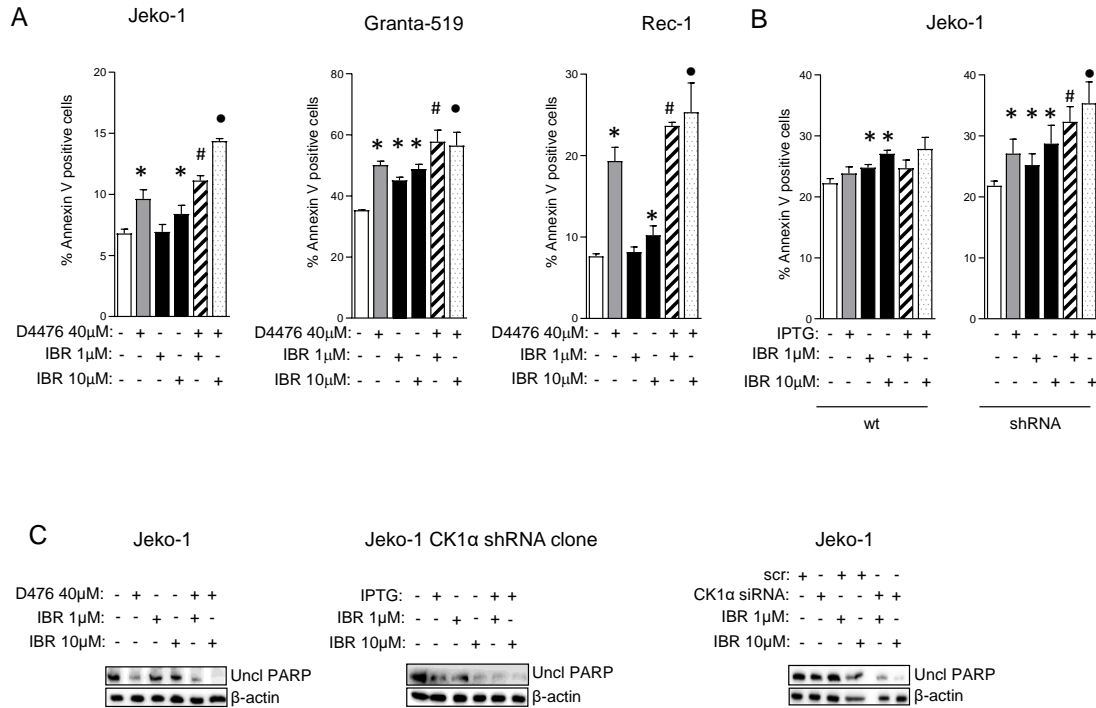

**Supplementary Figure 5. CK1 $\alpha$  inactivation empowers Ibrutinib induced cell death.** (A) % of Annexin V positive MCL cell lines in which CK1 $\alpha$  chemical inactivation was associated with Ibrutinib (IBR) treatment. Jeko-1, Granta-519, Rec-1 were treated with D4476 40  $\mu$ M for 48h, Ibrutinib 1  $\mu$ M or 10  $\mu$ M, alone or in combination with D4476 was added for the last 24h. (B) % of Annexin V positive cells Jeko-1 wt or Jeko-1 IPTG inducible *CSNK1A1* directed shRNA clone (named CK1 $\alpha$  shRNA) which were treated with IPTG 500 $\mu$ M for 13 days and with Ibrutinib 1  $\mu$ M or 10  $\mu$ M, alone or in combination with CK1 $\alpha$  silencing for the last 24h. Data represent the mean of % annexin V positive cells  $\pm$  SD of at least three independent experiments. \* indicates  $p < 0.05$ ; # indicates  $p < 0.05$  between samples treated with Ibrutinib 1  $\mu$ M together with D4476 (or CK1 $\alpha$  silencing) and Ibrutinib 1  $\mu$ M or D4476/CK1 $\alpha$  silencing alone; • indicates  $p < 0.05$  between samples treated with Ibrutinib 10  $\mu$ M together with D4476 (or CK1 $\alpha$  silencing) and Ibrutinib 10  $\mu$ M or D4476/CK1 $\alpha$  silencing alone. (C) Representative WB of uncleaved PARP expression in CK1 $\alpha$  silenced or CK1 chemical inhibited Jeko-1 MCL cells treated with Ibrutinib 1  $\mu$ M or 10  $\mu$ M for the last 24h. Left panel: Jeko-1 cells were treated as in A. Middle panel: the Jeko-1 CK1 $\alpha$  shRNA clone was treated with IPTG 500 $\mu$ M for 13 days to silence CK1 $\alpha$ . Right panel: Jeko-1 cells were electroporated with *CSNK1A1* directed siRNA oligo for 48h. In all panels ibrutinib 1  $\mu$ M or 10  $\mu$ M was added for the last 24h.  $\beta$  actin was used as loading control. The figure shows a representative WB, that was performed on at least 3 independent experiments.

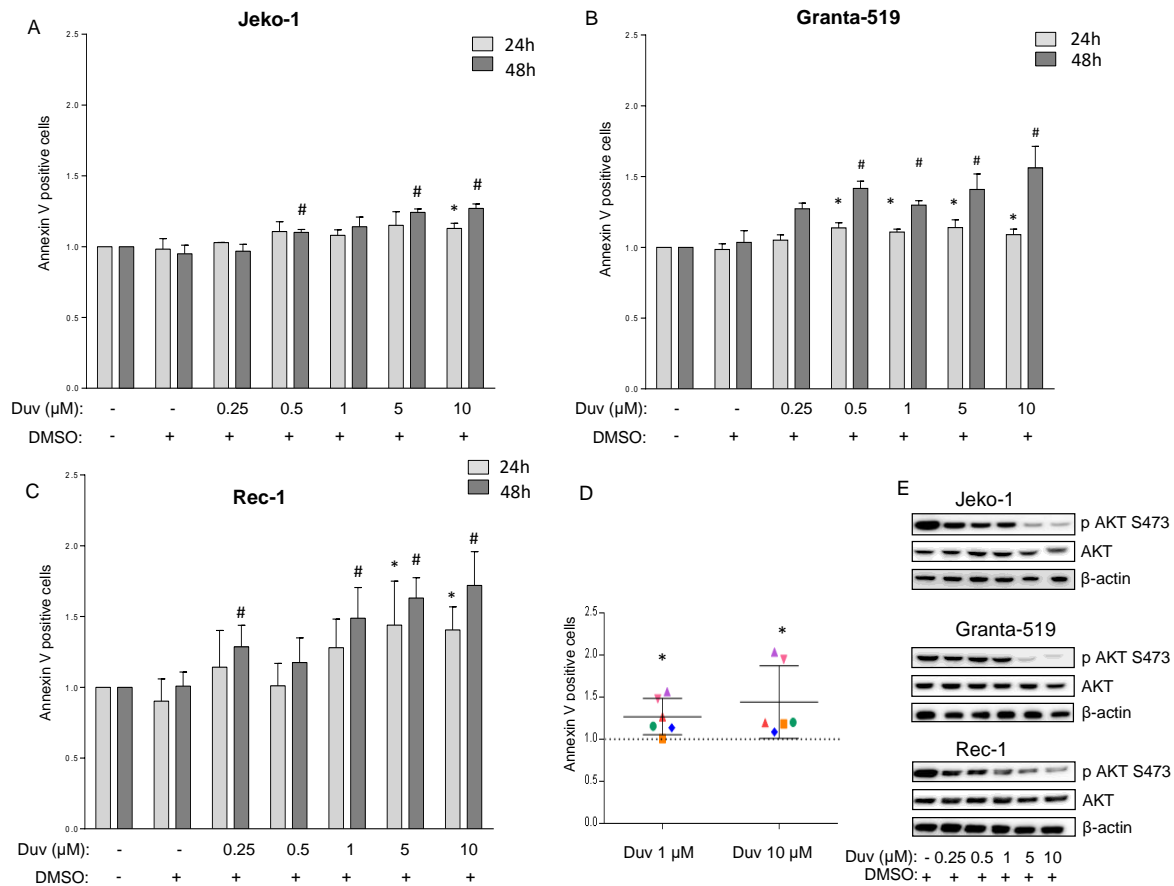

**Supplementary Figure 6. Duvelisib induces MCL cell apoptosis.** (A-D) Annexin V staining of MCL cell lines Jeko-1 (A), Granta-519 (B), Rec-1 (C), MCL patient derived B cells (D) treated with different concentration of Duvelisib (0.25 μM, 0.5 μM, 1 μM, 5 μM and 10 μM) for 24h (A, B, C, D) and 48h (A, B, C). Data are expressed as ratio over untreated and as mean ±SD of n=3 (A, B, C) independent experiments, and ratio over DMSO treated cells (n=6 patient samples) in D. \* indicates p < 0.05 at 24h ; # indicates p < 0.05 at 48h. (E) Representative WB performed on three independent experiments of Ser 473 phosphorylated AKT (p S473 AKT), total AKT in Jeko-1 (upper panel), Granta 519 (middle panel) and Rec-1 (bottom panel) treated with increasing concentrations of Duvelisib for 48h. β actin was used as loading control.

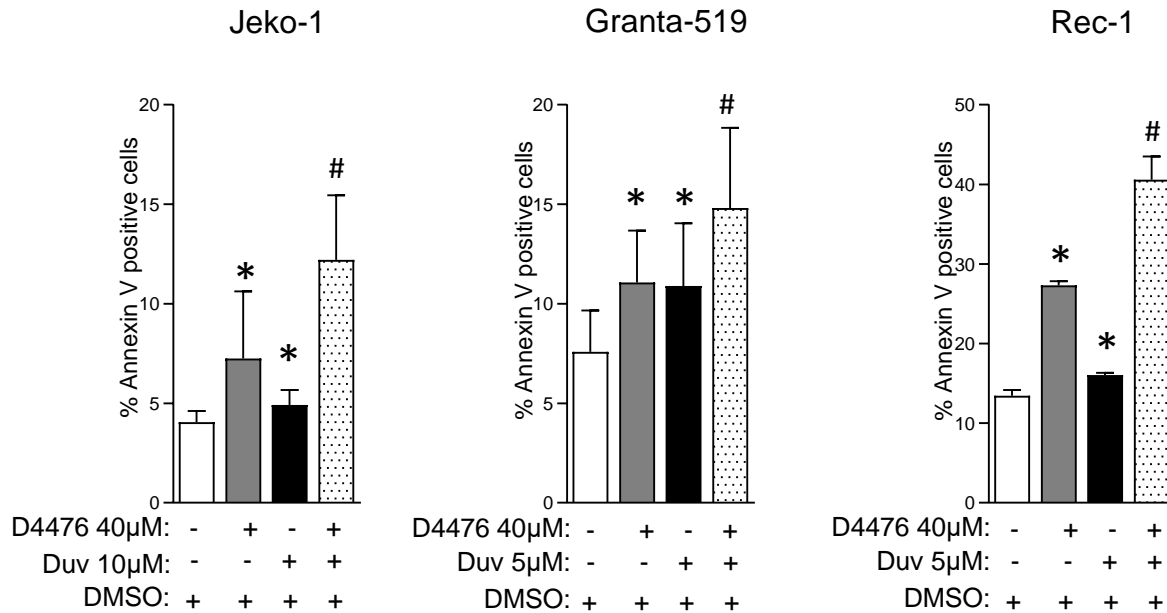

**Supplementary Figure 7. CK1 $\alpha$  inactivation empowers Duvelisib induced cell death.** % of Annexin V positive MCL cell lines in which CK1 $\alpha$  chemical inhibition was associated with Duvelisib (Duv) treatment. Jeko-1 cells were treated with Duv 10  $\mu$ M and Granta-519, Rec-1 with Duv 5  $\mu$ M for 48h. D4476 40  $\mu$ M alone or in combination with Duv was added for the last 24h. Data represent the mean of % annexin V positive cells  $\pm$  SD of at least three independent experiments. \* indicates  $p < 0.05$ ; # indicates  $p < 0.05$  between samples treated with Duv together with D4476 and Duv or D4476 alone.

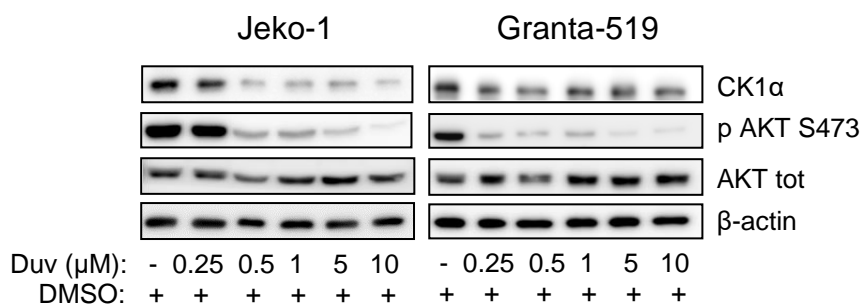

**Supplementary Figure 8. Duvelisib reduced CK1 $\alpha$  expression.** Representative WB of CK1 $\alpha$  protein expression in Jeko-1, Rec-1, Granta-519 MCL cells, treated with increasing concentration of Duv (0.25-10  $\mu$ M) for 24h of three (Jeko-1), two (Granta-519) independent experiments. Phosphorylated AKT in S473 (p AKT S473) and total AKT was detected to confirm Duv efficacy.  $\beta$  actin was used as loading control
